# Supplementary material
Source: MDPI journal article supplement (https://www.mdpi.com/2073-4344/13/1/138)
Supplement: s1 [file s1]

## Supporting Information

### Epoxidation of fatty acid methyl esters with hydrogen peroxide catalyzed by peroxopolyoxotungstate PW4 encapsulated in the MIL-100(Cr) framework

Anton L. Esipovich, Evgeny A. Kanakov, Tatyana A. Charykova and Ksenia V. Otopkova

#### Supplementary Materials Content:

|                                                                                        |     |
|----------------------------------------------------------------------------------------|-----|
| Figure S1. SEM images of MIL-100(Cr).....                                              | S2  |
| Figure S2. SEM images of PW12@MIL-100(Cr).....                                         | S3  |
| Figure S3. SEM images of PW4@MIL-100(Cr).....                                          | S4  |
| Figure S4. EDS analysis of PW12@MIL-100(Cr).....                                       | S5  |
| Figure S5. EDS analysis of PW4@MIL-100(Cr).....                                        | S5  |
| Figure S6. N <sub>2</sub> adsorption isotherms of MIL-100(Cr).....                     | S6  |
| Figure S7. N <sub>2</sub> adsorption isotherms of PW12@MIL-100(Cr).....                | S6  |
| Figure S8. N <sub>2</sub> adsorption isotherms of PW4@MIL-100(Cr).....                 | S7  |
| Figure S9. N <sub>2</sub> adsorption isotherms of PW4@MIL-100(Cr) after 1 cycles.....  | S7  |
| Figure S10. N <sub>2</sub> adsorption isotherms of PW4@MIL-100(Cr) after 5 cycles..... | S8  |
| Figure S11. Mass spectrum of FAME oxidation products.....                              | S9  |
| Figure S12. Mass spectrum of FAME Oligomerization products.....                        | S10 |
| Figure S13. Mass spectrum of methyl stearate oxidation products.....                   | S11 |
| Figure S14. SEM images of PW4@MIL-100(Cr) fresh and after 1 catalytic cycle.....       | S12 |
| Figure S15. XRD patterns of PW4@MIL-100(Cr) .....                                      | S13 |
| Figure S16. FTIR spectra of PW4@MIL-100(Cr).....                                       | S13 |

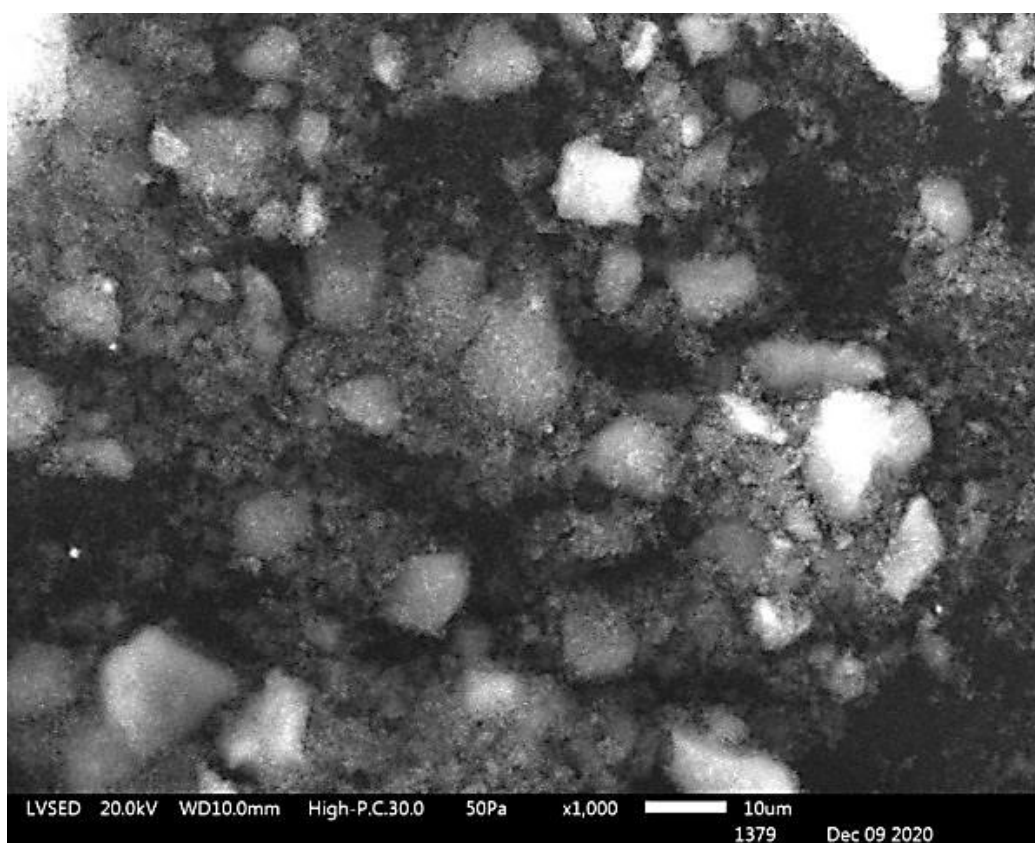

(a)

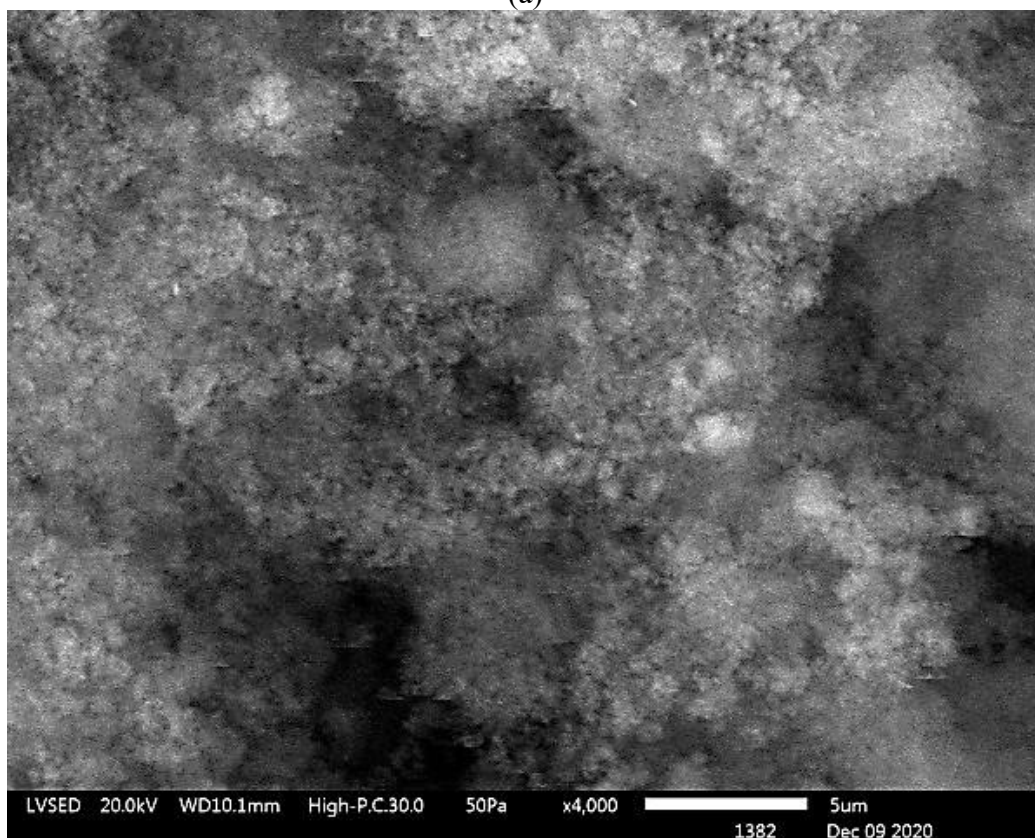

(b)

**Figure S1.** SEM images of (a, b) MIL-100(Cr).

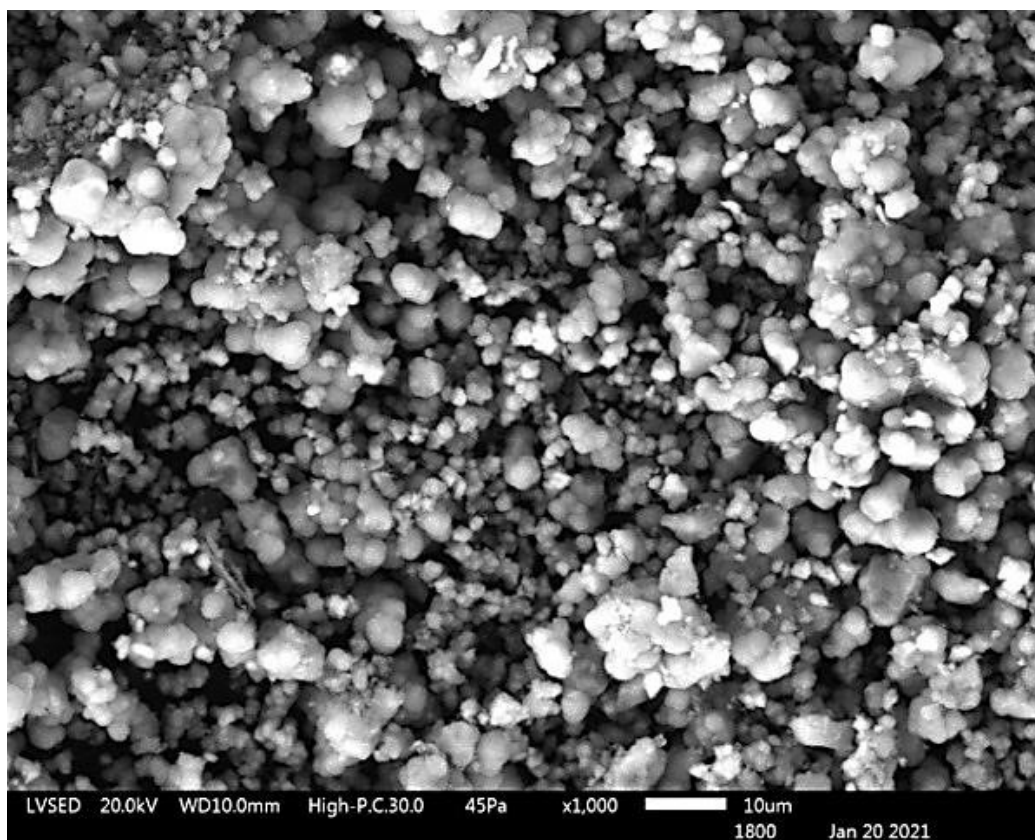

(a)

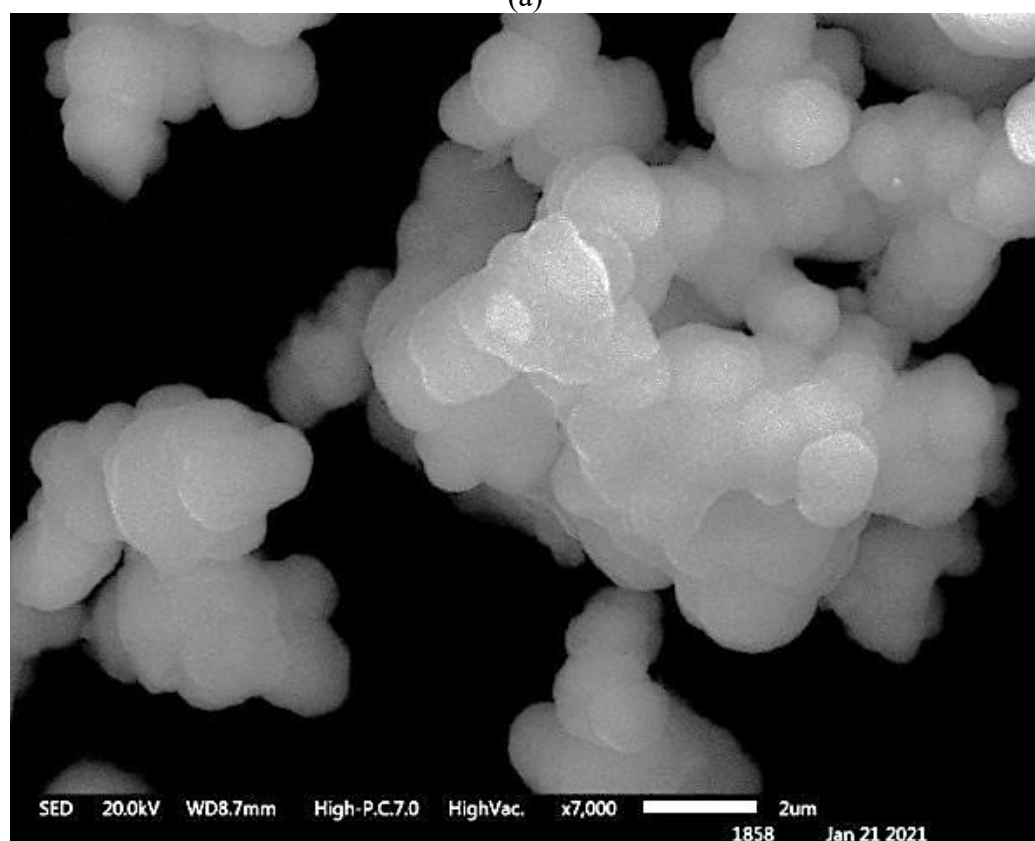

(b)

**Figure S2.** SEM images of (a, b) PW12@MIL-100(Cr).

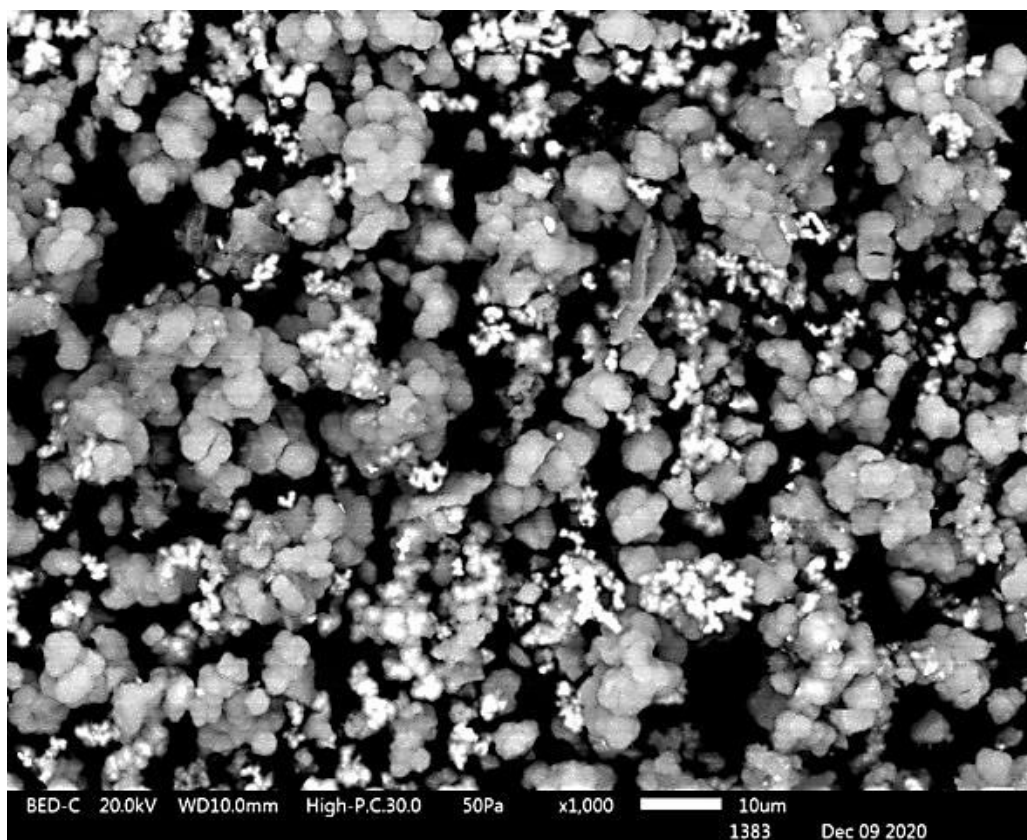

(a)

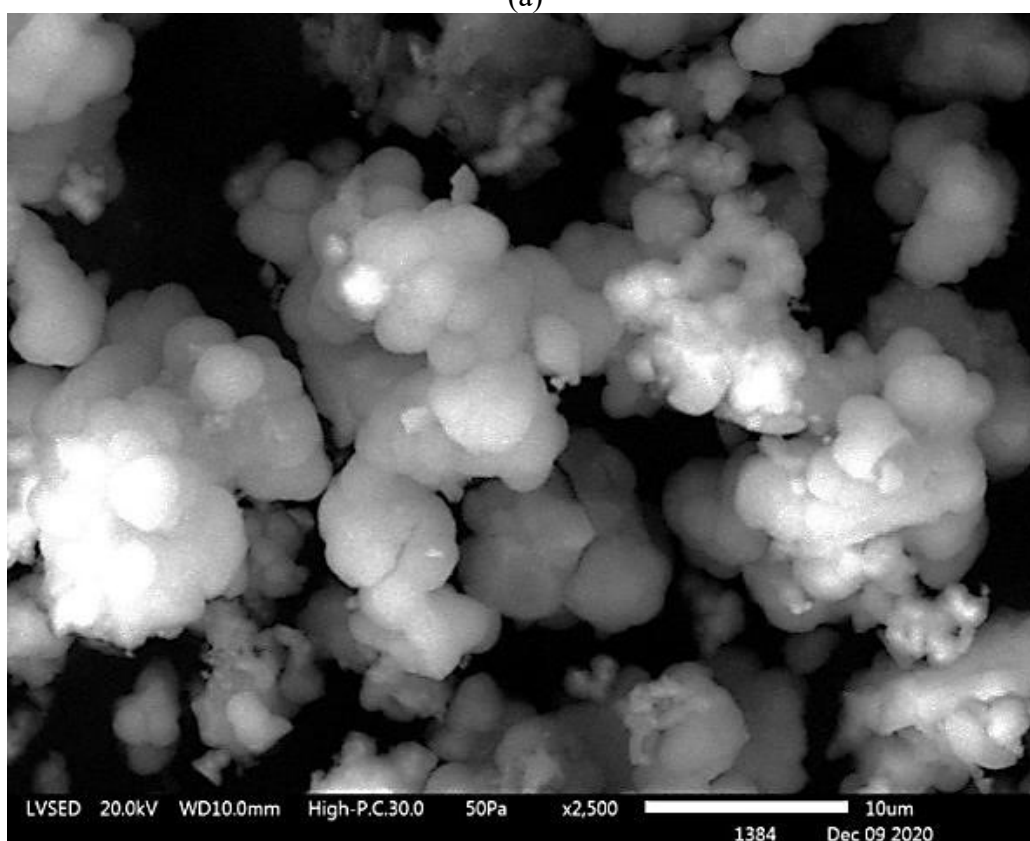

(b)

Figure S3. SEM images of (a, b) PW4@MIL-100(Cr).



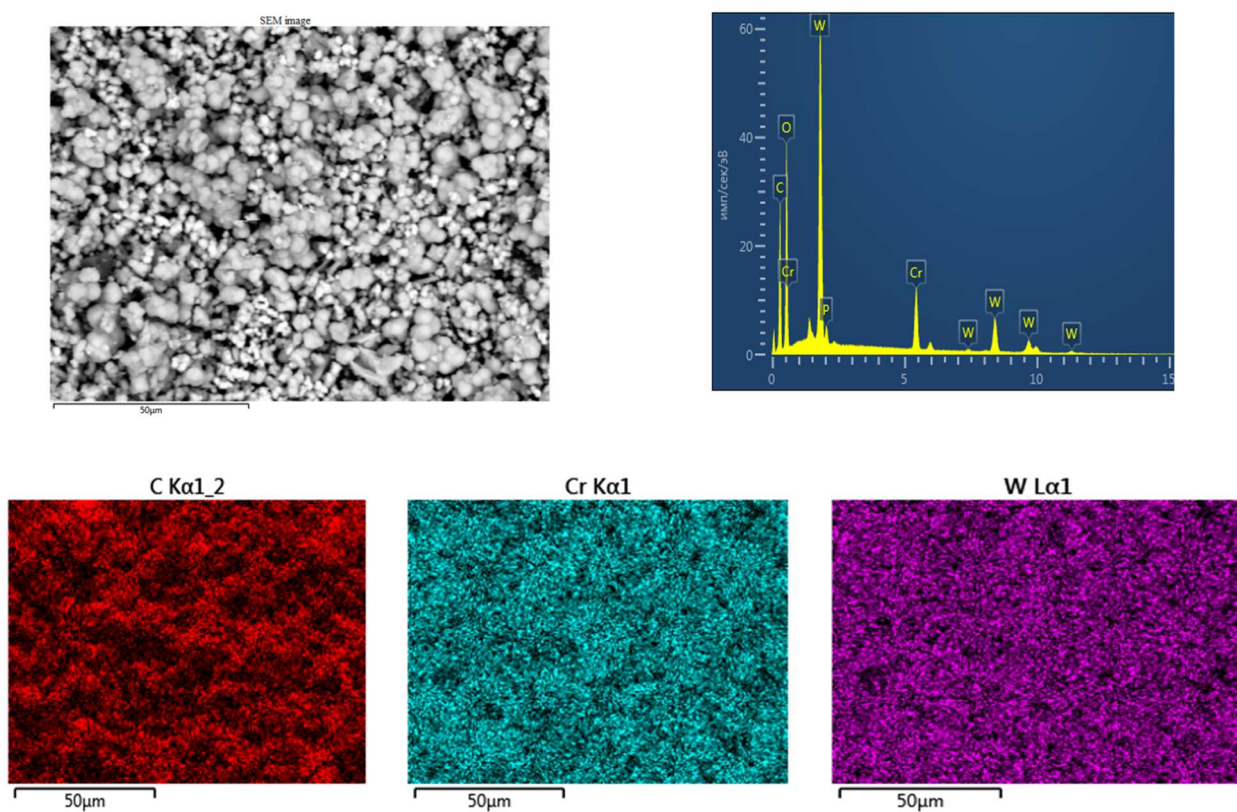

Figure S4. EDS analysis of PW12@MIL-100(Cr).

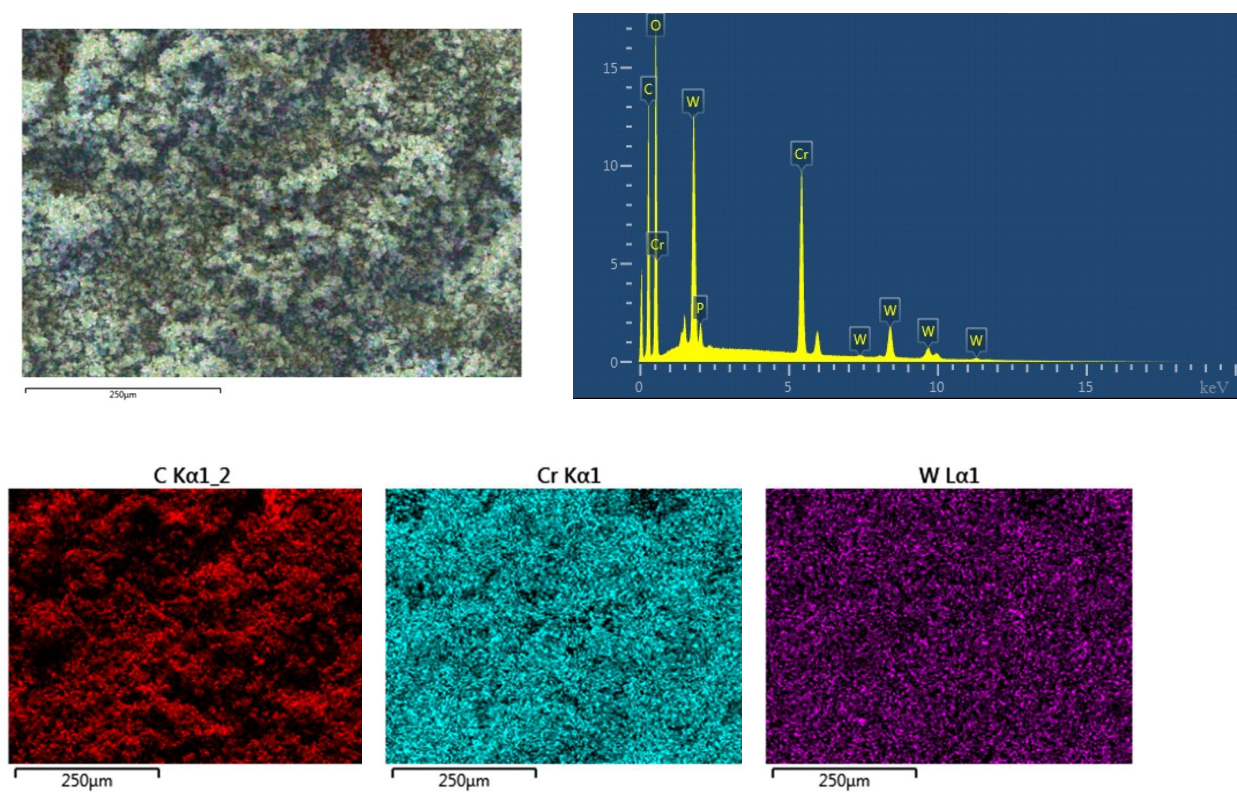

Figure S5. EDS analysis of PW4@MIL-100(Cr).

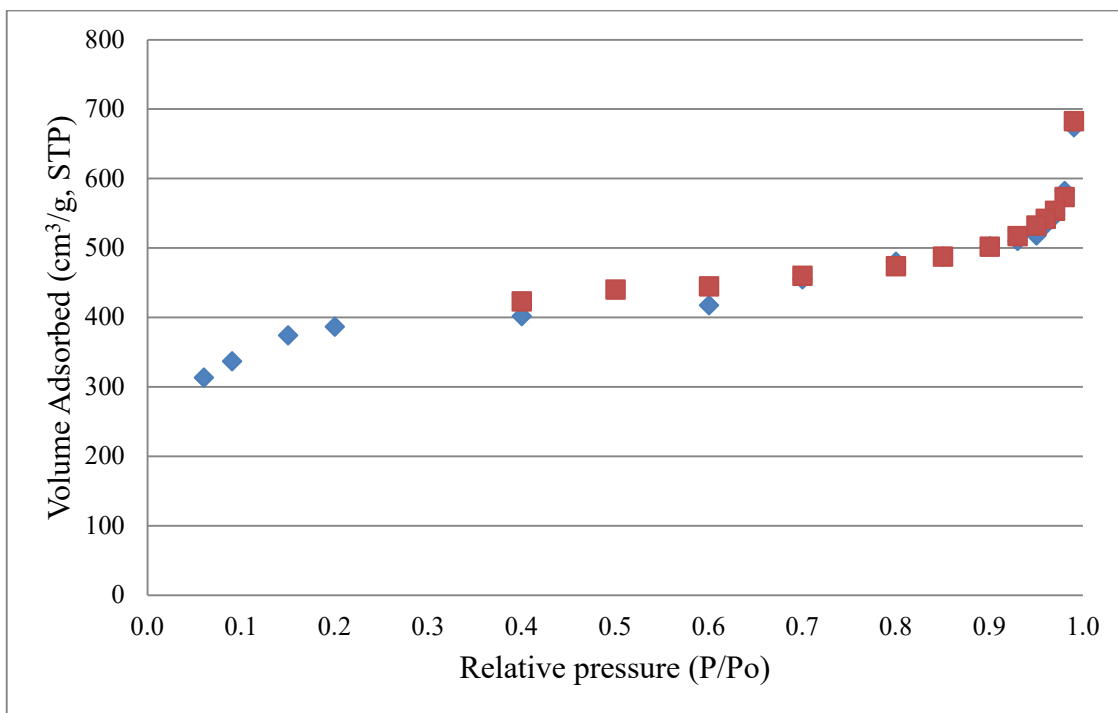

Figure S6. N<sub>2</sub> adsorption-desorption isotherm of MIL-100(Cr). ♦—adsorption curve, ■—desorption curve.

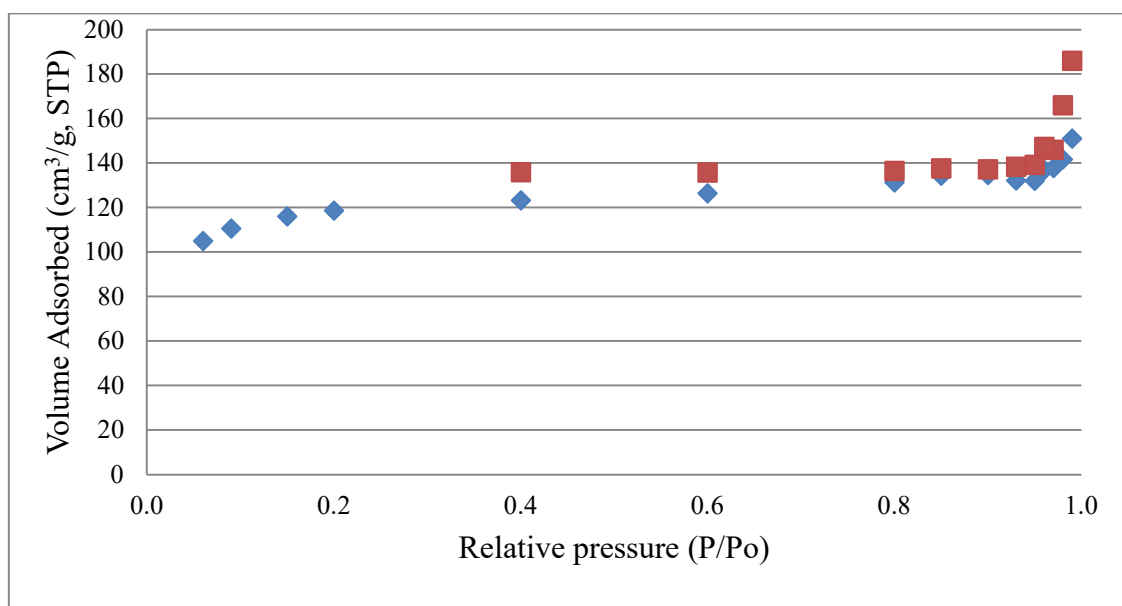

Figure S7. N<sub>2</sub> adsorption-desorption isotherm of PW12@MIL-100(Cr). ♦—adsorption curve, ■—desorption curve.

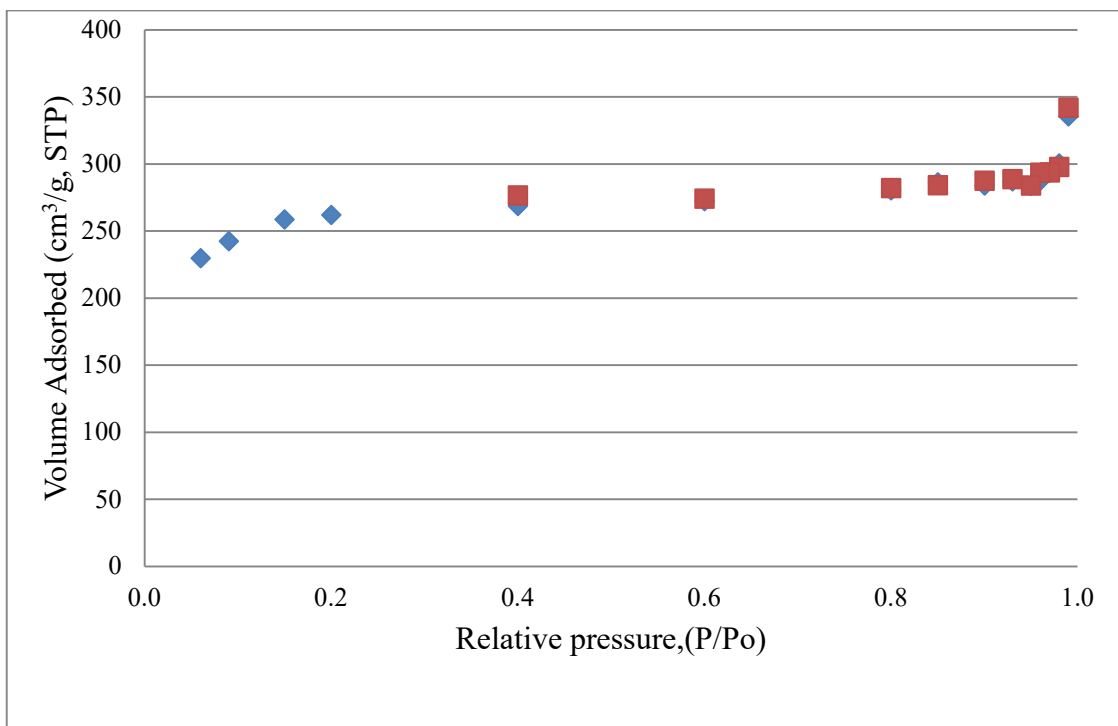

Figure S8. N<sub>2</sub> adsorption-desorption isotherm of PW4@MIL-100(Cr). ♦—adsorption curve, ■—desorption curve.

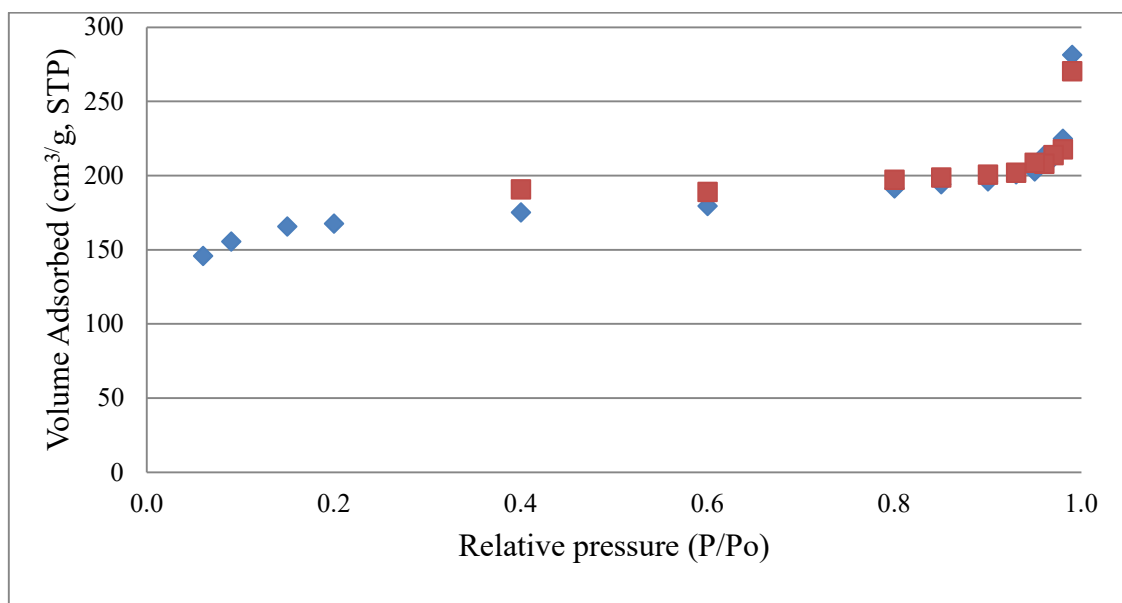

Figure S9. N<sub>2</sub> adsorption-desorption isotherm of PW4@MIL-100(Cr) after 1 cycles. ♦—adsorption curve, ■—desorption curve.

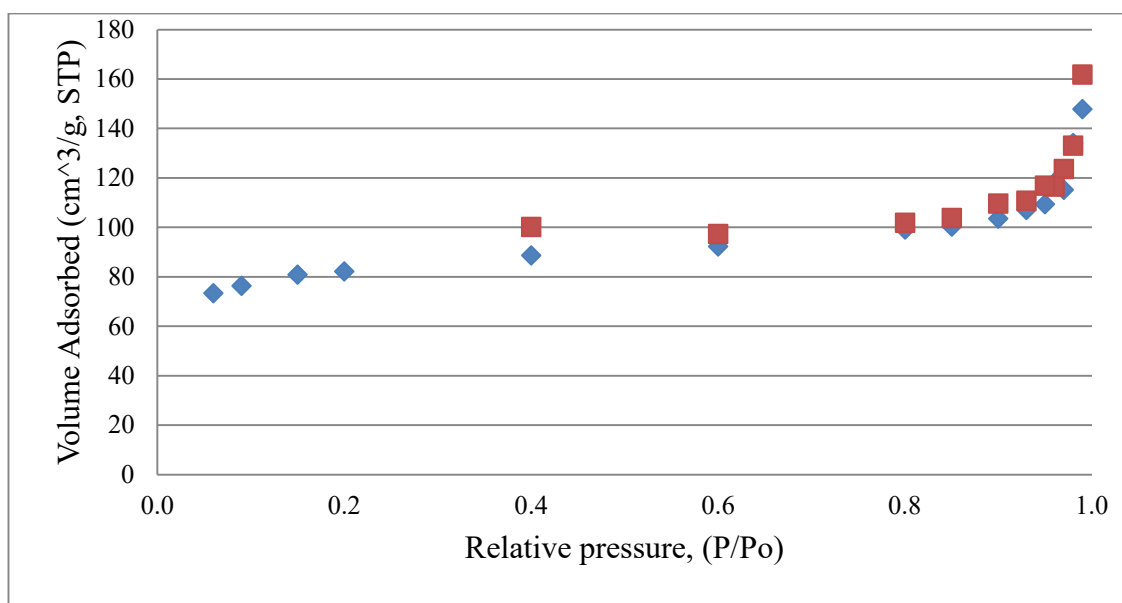

Figure S10. N<sub>2</sub> adsorption-desorption isotherm of PW4@MIL-100(Cr) after 5 cycles. ◆—adsorption curve, ■—desorption curve.



# Nonanal

Peak#:1 R.Time:2.275(Scan#:14)

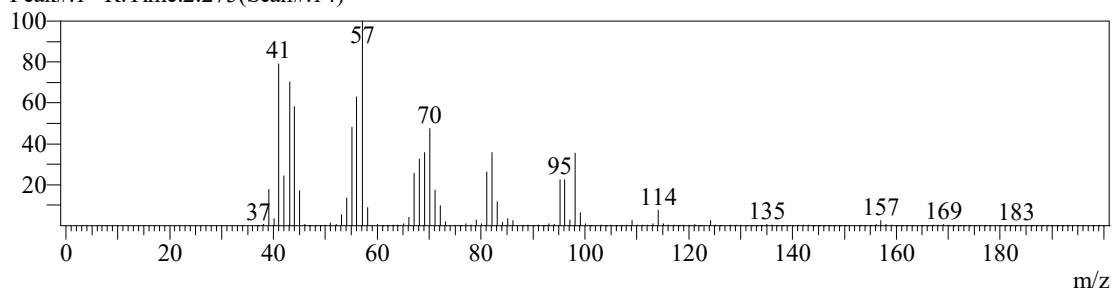

(a)

Methyl 9-oxononanoate

Peak#:2 R.Time:4.019(Scan#:363)

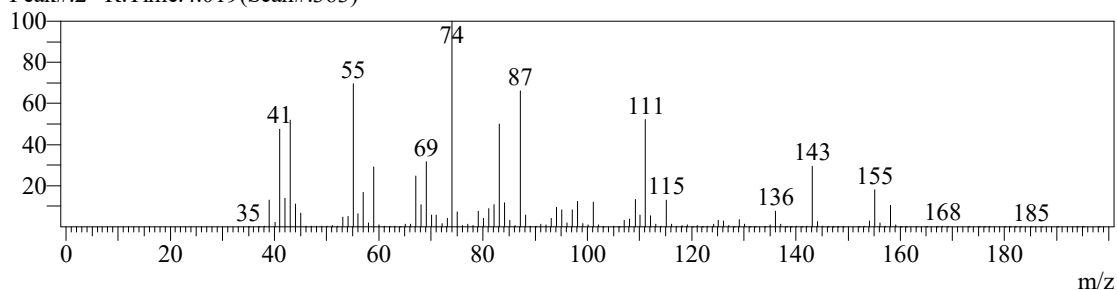

(b)

Methyl 10-oxostearate

Peak#:3 R.Time:48.338(Scan#:9227)

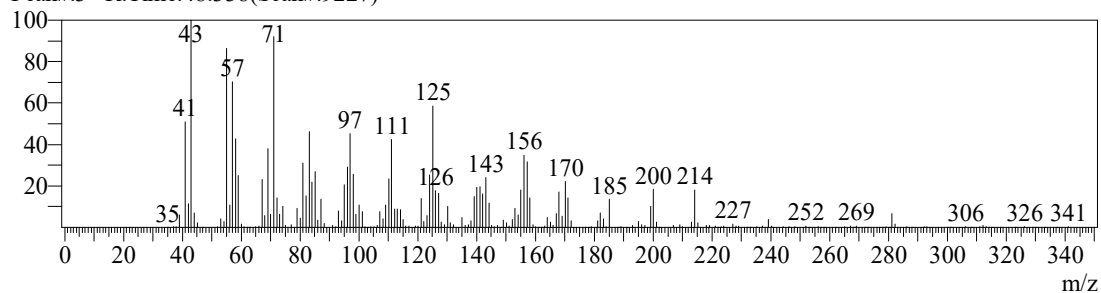

(c)

Figure S11. Mass spectrum of FAME oxidation products (GC-MS). (a) methyl 5-oxo-octadecanoate, (b) Methyl 9-oxononanoate, (c) methyl 10-oxo-octadecanoate.

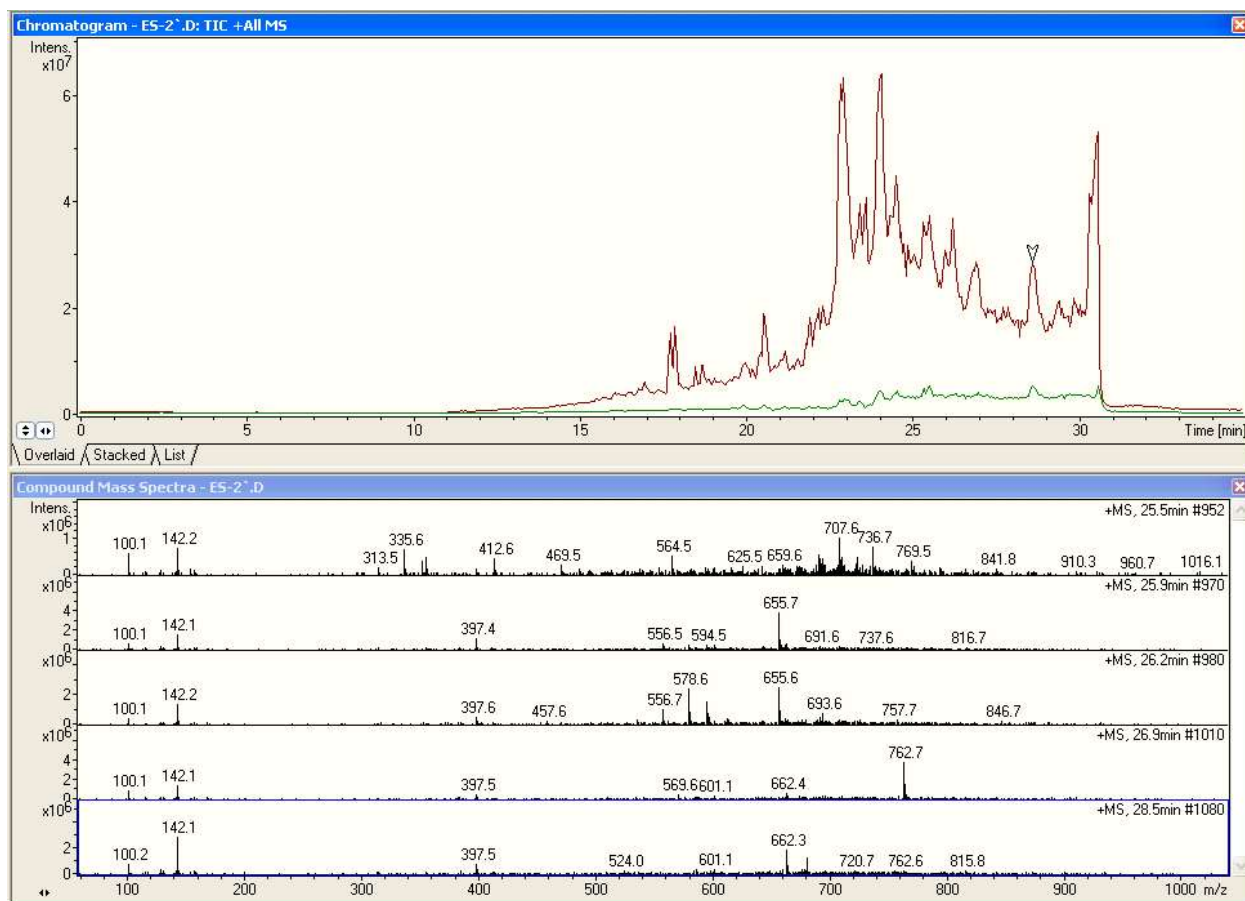

Figure S12. Mass spectrum of FAME Oligomerization products (HPLC-MS). Mass spectrum (positive) of peaks with a retention time of 25.5 min; 25.9 min; 26.2 min; 26.9 min; 28.5 min.

Methyl 5-oxo-octadecanoate

Peak#:1 R.Time:26.015(Scan#:4762)

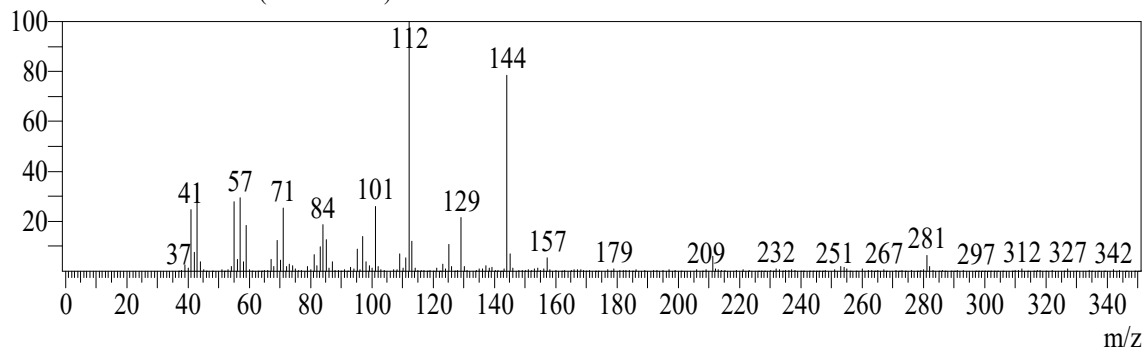

(a)

Methyl 10-oxo-octadecanoate

Peak#:2 R.Time:26.669(Scan#:4893)

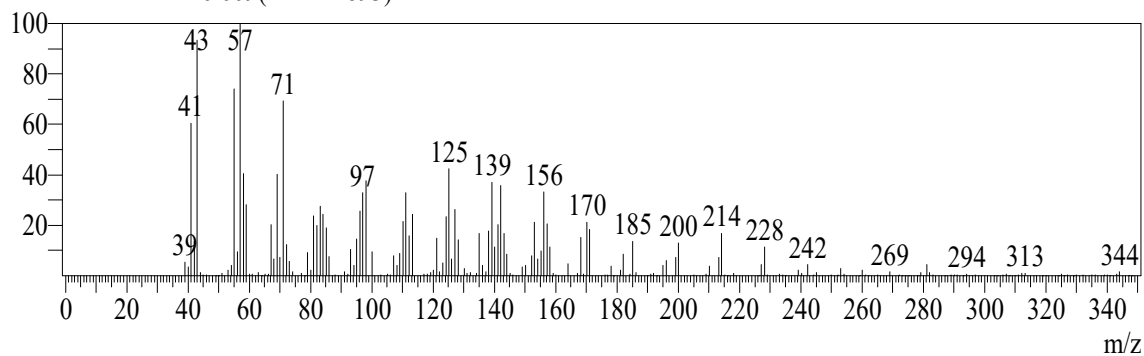

(b)

Methyl 17-oxo-octadecanoate

Peak#:3 R.Time:27.724(Scan#:5104)

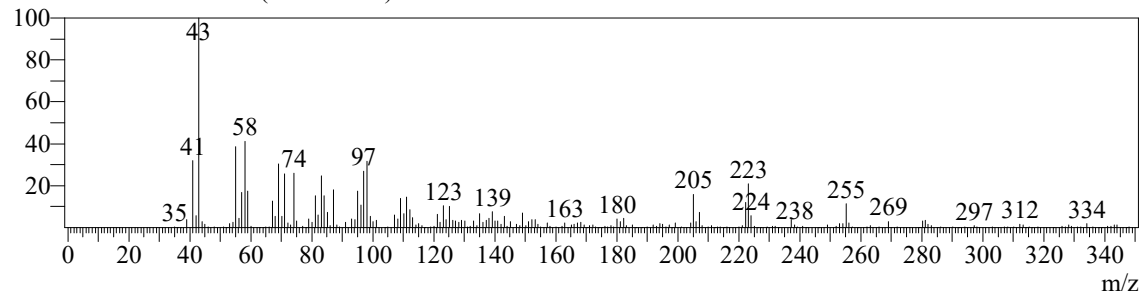

(c)

Figure S13. Mass spectrum of methyl stearate oxidation products (GC-MS). (a) methyl 5-oxo-octadecanoate, (b) methyl 10-oxo-octadecanoate, (c) methyl 17-oxo-octadecanoate.

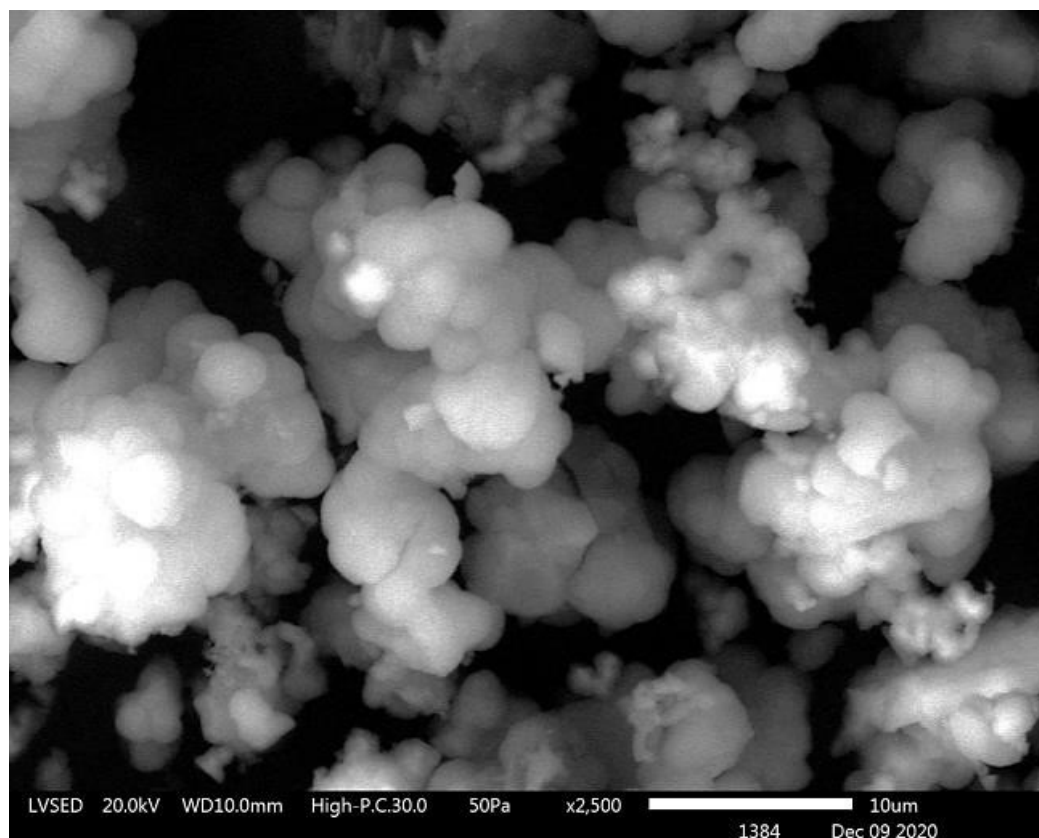

(a)

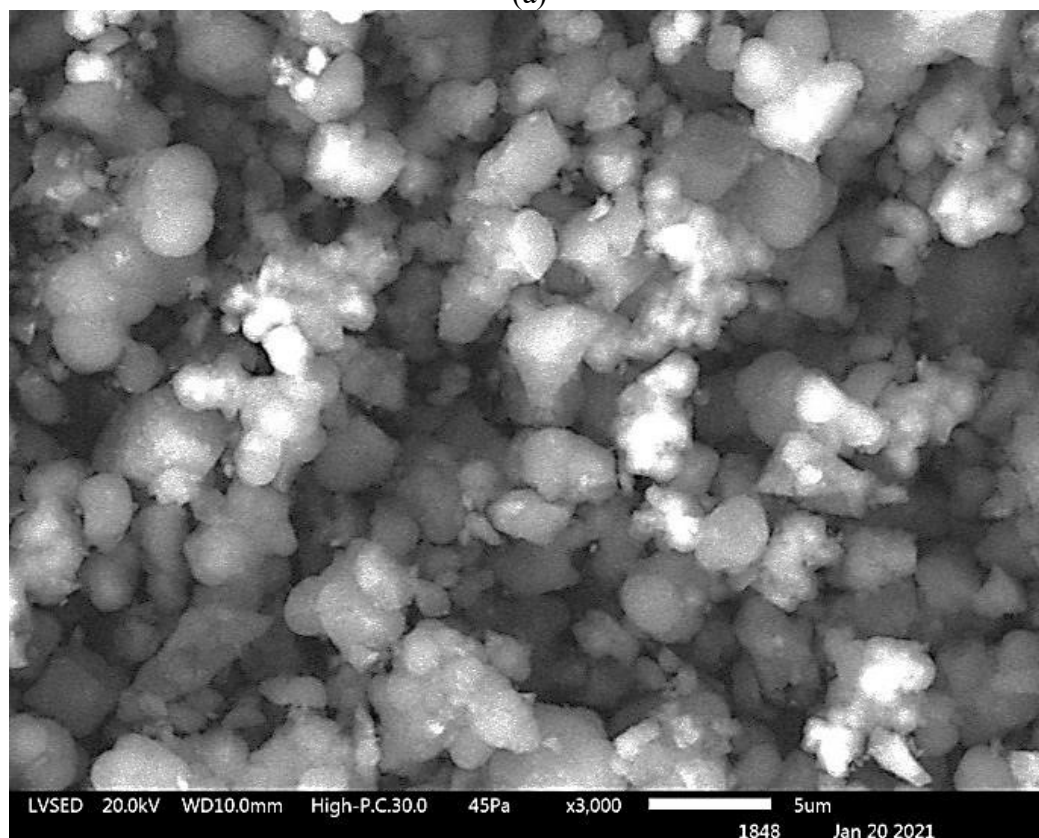

(b)

Figure S14. SEM images of (a) fresh PW4@-MIL-100(Cr) and (b) spent PW4@-MIL-100(Cr) powders.

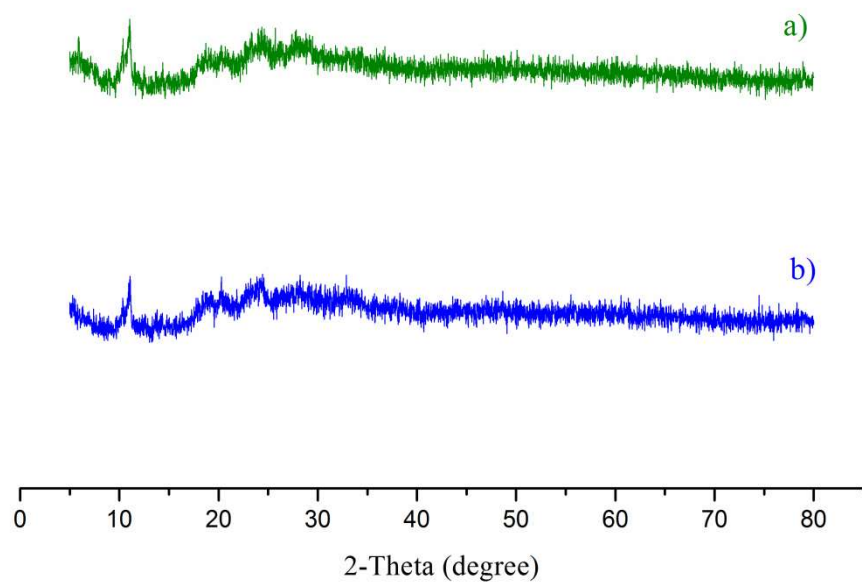

Figure S15. XRD patterns of PW4@MIL-100(Cr) fresh prepared (a) and after 5 catalytic cycle (b).

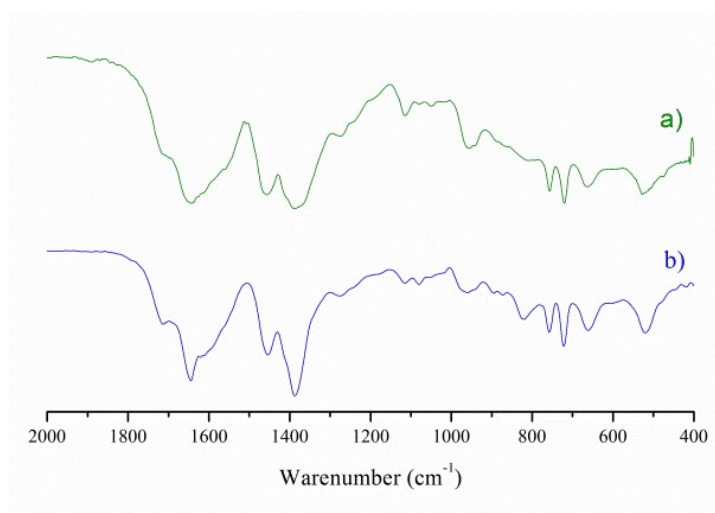

Figure S16. FTIR spectra of PW4@MIL-100(Cr) fresh prepared (a) and after 5 catalytic cycle (b).
